# Supplementary material for: PEGylated Magnetic Nano-Assemblies as Contrast Agents for Effective T2-Weighted MR Imaging
Source: MDPI journal article supplement (doi:10.3390/nano9030410), 2019-03-11
Supplement: s1 [file s1]

# Supplementary Nanomaterials: PEGylated magnetic nano-assemblies as contrast agents for effective T2weighted MR imaging

Byunghoon Kang<sup>1</sup>, Jaewoo Lim<sup>2,3</sup>, Hye-young Son<sup>4,5</sup>, Yuna Choi<sup>4</sup>, Taejoon Kang<sup>2,3</sup>, Juyeon Jung<sup>2,3</sup>, Yong-Min Huh<sup>4,6\*</sup>, Seungjoo Haam<sup>1\*</sup>, and Eun-Kyung Lim<sup>2,3,6\*</sup>

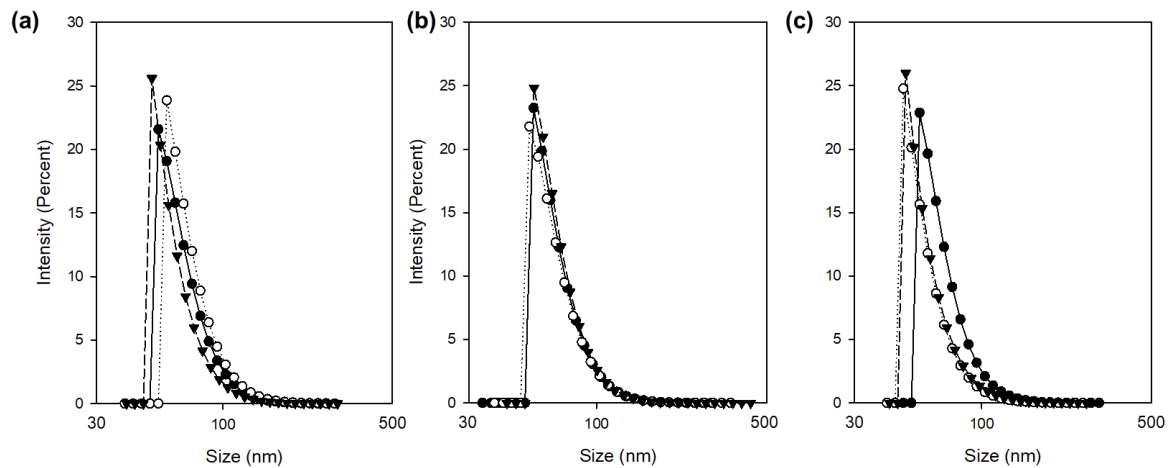

**Figure S1.** The size analysis graphs of PEGylated MNs over 44 days (a): 0 day, b): 30 day and c): 44day). All measurements were repeated three times.
